# Supplementary material for: Ultrahigh-Throughput Screening of High-β-Xylosidase-Producing Penicillium piceum and Investigation of the Novel β-Xylosidase Characteristics
Source: MDPI journal article supplement (doi:10.3390/jof8040325), 2022-03-22
Supplement: s1 [file s1]

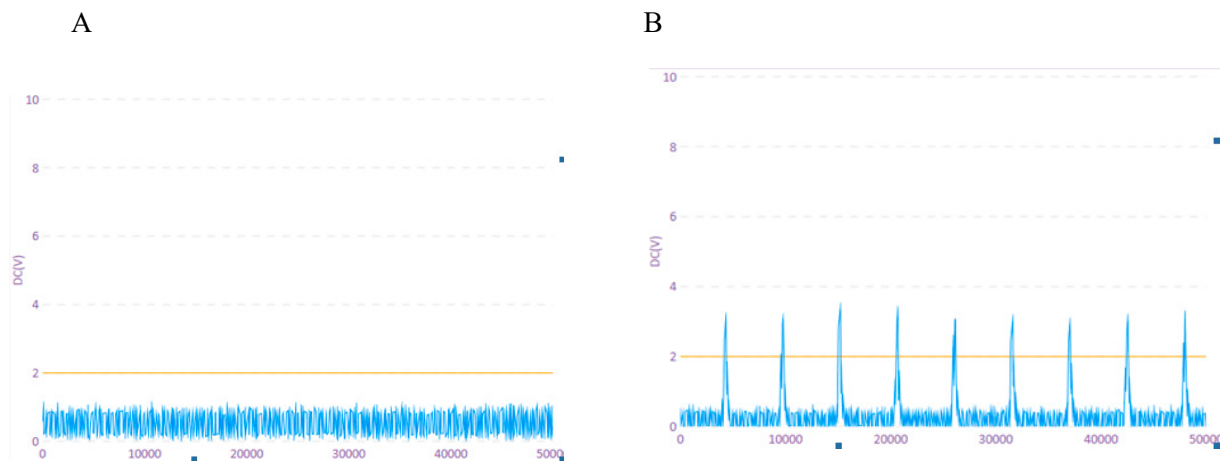

Figure S1: Comparison of fluorescence signal released from negative ( with no  $\beta$ -xylosidase activity) and positive control (with high  $\beta$ -xylosidase activity).

MTLSVLTVASLVATALGSKVSVVVDASSKLGPWTPIHQYYGCDEPNYAYYPHGSAL  
LKELGSLGKAQTYFRTHNLLTTGQPGLVGVPLKKGSTNAYTLDENGMPVYNFTIV  
DEIFDHYLANNVKPFLEIGFMPEALAVDPDPYFFDFDPAAGPDNIYTGWTHPPKSYER  
WGKLIYEFTKHLVDRYGAKENVQWPFEVWNEPNIPYWNGTTAEYYKLYDYTVRSV  
LEALPTAHIGGPAVAGGASGSYLGDFLEHCSQGTNYATGEKGVPLDLISFHAKGV PQ  
FINTTDTPGSSGYLQMDMSPQLQQIDEAFEVITSFHQYKQKPVFMSEYDPDGCAACTS  
AAYDYRNGLMYGAYSAASFARAIDLAANRSVNLQAALTWAFEYEKNAILPNETGYF  
DGFRVLSTQGIDKPVLNFHRMWSMLSGDRIKAESSAQIPIQEVLSNGIHGAQTDVGSL  
ATLTEDGRALYVFLWHYHDNDLSFPDAQVSIDIEGLPAHF AEAKLTHYRVDNKHSNS  
YAKWLSMGSPQSPTAEQYNELVAAGKLTTLGSPSMHAHKGRLSTDLSLPIQALSLL  
VFTAL

Figure S2: Amino acid sequence of PpBXL. The six identified peptides are marked with underline.
